# Supplementary material for: Detection of Acquired Antibiotic Resistance Genes in Domestic Pig (Sus scrofa) and Common Carp (Cyprinus carpio) Intestinal Samples by Metagenomics Analyses in Hungary
Source: MDPI journal article supplement (doi:10.3390/antibiotics11101441), 2022-10-20
Supplement: s1 [file s1]

**Supplementary Table S1. Acquired tetracycline resistance determinants identified in domestic pig and common carp intestinal microbiomes from Hungary**

| Resistance Determinant            | Resistance Mechanism                                       | Highest Coverage in the Different Sample Types (%) |                       |                     |                      |                        |
|-----------------------------------|------------------------------------------------------------|----------------------------------------------------|-----------------------|---------------------|----------------------|------------------------|
|                                   |                                                            | Domestic Pig, Duodenum                             | Domestic Pig, Jejunum | Domestic Pig, Ileum | Domestic Pig, Faeces | Common Carp, Intestine |
| <i>tet(40)</i>                    | major facilitator superfamily (MFS) antibiotic efflux pump | 100.00                                             | .                     | 100.00              | 100.00               | .                      |
| <b><i>tet(44)</i><sup>a</sup></b> | ribosomal protection protein                               | .                                                  | .                     | 100.00              | 96.98                | .                      |
| <b><i>tet(A)</i></b>              | major facilitator superfamily (MFS) antibiotic efflux pump | .                                                  | .                     | .                   | 72.00                | 97.80                  |
| <b><i>tet(B)</i></b>              | major facilitator superfamily (MFS) antibiotic efflux pump | .                                                  | 100.00                | 100.00              | .                    | 70.65                  |
| <b><i>tet(C)</i></b>              | major facilitator superfamily (MFS) antibiotic efflux pump | .                                                  | 100.00                | .                   | 100.00               | .                      |
| <i>tet(E)</i>                     | major facilitator superfamily (MFS) antibiotic efflux pump | .                                                  | .                     | .                   | .                    | 100.00                 |
| <i>tet(H)</i>                     | major facilitator superfamily (MFS) antibiotic efflux pump | .                                                  | .                     | 98.56               | .                    | .                      |
| <i>tet(L)</i>                     | major facilitator superfamily (MFS) antibiotic efflux pump | .                                                  | 99.93                 | .                   | 99.93                | .                      |
| <b><i>tet(M)</i></b>              | ribosomal protection protein                               | .                                                  | 100.00                | 84.48               | 100.00               | .                      |
| <b><i>tet(O)</i></b>              | ribosomal protection protein                               | .                                                  | .                     | 100.00              | 70.99                | .                      |
| <b><i>tet(Q)</i></b>              | ribosomal protection protein                               | 100.00                                             | 100.00                | 100.00              | 90.97                | .                      |
| <b><i>tet(W)</i></b>              | ribosomal protection protein                               | 100.00                                             | 99.69                 | 94.84               | .                    | .                      |
| <b><i>tet(X)</i></b>              | flavin-dependent monooxygenase                             | .                                                  | .                     | .                   | 100.00               | 100.00                 |
| <b><i>tetA(P)</i></b>             | major facilitator superfamily (MFS) antibiotic efflux pump | .                                                  | 96.20                 | 96.36               | 96.36                | .                      |
| <i>tetB(P)</i>                    | ribosomal protection protein                               | .                                                  | 100.00                | 100.00              | 100.00               | .                      |

<sup>a</sup> Bold blue charaters indicate a resistance determinant also identified in untreated wastewater from the Budapest North Wastewater Treatment Plant in Hungary by Hendriksen et al. (2019) [ 72 ]. NCBI BioSample: SAMEA4527629

**Supplementary Table S2. Acquired aminoglycoside resistance determinants identified in domestic pig and common carp intestinal microbiomes from Hungary**

| Resistance Determinant                        | Resistance Mechanism                         | Highest Coverage in the Different Sample Types (%) |                       |                     |                      |                        |
|-----------------------------------------------|----------------------------------------------|----------------------------------------------------|-----------------------|---------------------|----------------------|------------------------|
|                                               |                                              | Domestic Pig, Duodenum                             | Domestic Pig, Jejunum | Domestic Pig, Ileum | Domestic Pig, Faeces | Common Carp, Intestine |
| <i>aac(6')-Im</i>                             | aminoglycoside acetyltransferase             |                                                    | .                     | 100.00              | 100.00               | .                      |
| <b><i>aac(6')-aph(2'')</i><sup>a</sup></b>    | aminoglycoside acetyl and phosphotransferase |                                                    | 100.00                | .                   | 70.69                | .                      |
| <b><i>ant(3'')-la (aadA1)</i><sup>b</sup></b> | aminoglycoside nucleotidyltransferase        | .                                                  | .                     |                     | 100.00               |                        |
| <b><i>ant(3'')-la (aadA2)</i></b>             | aminoglycoside nucleotidyltransferase        |                                                    | .                     |                     | .                    | 90.15                  |
| <i>ant(6)-la (aadE)</i>                       | aminoglycoside nucleotidyltransferase        | 100.00                                             | 100.00                | 100.00              | 100.00               | .                      |
| <b><i>ant(6)-lb</i></b>                       | aminoglycoside nucleotidyltransferase        | .                                                  | .                     | 100.00              | 100.00               | .                      |
| <i>ant(9)-la</i>                              | aminoglycoside nucleotidyltransferase        | .                                                  | .                     | .                   | 69.48                | .                      |
| <i>aph(2'')-lb</i>                            | aminoglycoside phosphotransferase            | .                                                  | .                     | 100.00              | 100.00               | .                      |
| <i>aph(2'')-lc</i>                            | aminoglycoside phosphotransferase            | .                                                  | 100.00                | .                   | 100.00               | .                      |
| <i>aph(2'')-lf</i>                            | aminoglycoside phosphotransferase            | 100.00                                             | 100.00                | 100.00              | 100.00               | .                      |
| <i>aph(2'')-lh</i>                            | aminoglycoside phosphotransferase            | .                                                  | .                     | .                   | 100.00               | .                      |
| <i>aph(3')-la</i>                             | aminoglycoside phosphotransferase            | .                                                  | .                     | 100.00              | .                    | .                      |
| <b><i>aph(3'')-lb (strA)</i></b>              | aminoglycoside phosphotransferase            | .                                                  | 99.88                 | 99.88               | 72.14                | 66.55                  |
| <b><i>aph(6)-ld (strB)</i></b>                | aminoglycoside phosphotransferase            | .                                                  | .                     | 76.70               | .                    |                        |
| <i>aph(3')-III</i>                            | aminoglycoside phosphotransferase            | .                                                  | 100.00                | 100.00              | 100.00               | .                      |
| <i>rmtF</i>                                   | 16S rRNA methyltransferase                   | .                                                  | .                     | .                   | 100.00               | .                      |

<sup>a</sup> Bold blue characters indicate a resistance determinant also identified in untreated wastewater from the Budapest North Wastewater Treatment Plant in Hungary by Hendriksen et al. (2019) [ 72 ]. NCBI BioSample: SAMEA4527629

<sup>b</sup> *aadA1* is included in the *aadA\_clust1* ResFinder gene cluster as described by Munk et al. (2018) and Hendriksen et al., (2019) [30, 72]

**Supplementary Table S3. Acquired  $\beta$ -lactame resistance determinants identified in domestic pig and common carp intestinal microbiomes from Hungary**

| Resistance Determinant                    | Resistance Mechanism                                                   | Highest Coverage in Different Sample Types (%) |                       |                     |                      |                        |
|-------------------------------------------|------------------------------------------------------------------------|------------------------------------------------|-----------------------|---------------------|----------------------|------------------------|
|                                           |                                                                        | Domestic Pig, Duodenum                         | Domestic Pig, Jejunum | Domestic Pig, Ileum | Domestic Pig, Faeces | Common Carp, Intestine |
| <i>bla</i> <sub>ACI-1</sub>               | Ambler class A extended-spectrum $\beta$ -lactamase                    | 100.00                                         | 100.00                | 63.05               | 100.00               | -                      |
| <i>bla</i> <sub>OXA</sub>                 | Ambler class D OXA-61 family $\beta$ -lactamase                        | -                                              | -                     | -                   | 99.35                | -                      |
| <i>bla</i> <sub>OXA</sub>                 | Ambler class D OXA-48 family carbapenem-hydrolyzing $\beta$ -lactamase | -                                              | -                     | -                   | -                    | 85.46                  |
| <i>ampS</i> ( <i>bla</i> <sub>OXA</sub> ) | Ambler class D OXA-12 family $\beta$ -lactamase                        | -                                              | -                     | -                   | -                    | 97.23                  |
| <i>bla</i> <sub>ROB-1</sub>               | Ambler class A broad spectrum $\beta$ -lactamase                       | -                                              | 100.00                | 100.00              | -                    | -                      |
| <b><i>cfxA3</i><sup>a,b</sup></b>         | Ambler class A $\beta$ -lactamase                                      | -                                              | -                     | 75.47               | 100.00               | -                      |
| <b><i>cfxA4</i><sup>a,b</sup></b>         | Ambler class A $\beta$ -lactamase                                      | -                                              | -                     | -                   | 100.00               | -                      |
| <b><i>cfxA5</i><sup>a,b</sup></b>         | Ambler class A $\beta$ -lactamase                                      | -                                              | -                     | -                   | 100.00               | -                      |
| <b><i>cfxA6</i><sup>a</sup></b>           | Ambler class A $\beta$ -lactamase                                      | -                                              | -                     | -                   | 100.00               | -                      |
| <i>cphA4</i>                              | Ambler class B, subclass B2 metallo- $\beta$ -lactamase, carbapenemase | -                                              | -                     | -                   | -                    | 99.48                  |

<sup>a</sup> Bold blue charaters indicate a resistance determinant also identified in untreated wastewater from the Budapest North Wastewater Treatment Plant in Hungary by Hendriksen et al. (2019) [ 72 ]. NCBI BioSample: SAMEA4527629

<sup>b</sup> included in the *cfxA\_clust* ResFinder gene cluster as described by Munk et al. (2018) and Hendriksen et al., (2019) [30, 72]

**Supplementary Table S4. Acquired resistance determinants of other antibiotic classes identified in domestic pig and common carp intestinal microbiomes from Hungary**

| Antibiotic Class | Resistance Determinant           | Resistance Mechanism                | Highest Coverage in the Different Sample Types (%) |                       |                     |                      |                        |
|------------------|----------------------------------|-------------------------------------|----------------------------------------------------|-----------------------|---------------------|----------------------|------------------------|
|                  |                                  |                                     | Domestic Pig, Duodenum                             | Domestic Pig, Jejunum | Domestic Pig, Ileum | Domestic Pig, Faeces | Common Carp, Intestine |
| Phenicol         | <i>catP</i>                      | chloramphenicol acetyltransferase   | .                                                  | .                     | .                   | 100.00               | .                      |
| Phenicol         | <i>cfrC</i>                      | 23S rRNA methyltransferase          | .                                                  | .                     | 67.23               | 100.00               | .                      |
| Trimethoprim     | <i>dfrA3</i>                     | dihydrofolate reductase             | .                                                  | .                     | .                   | .                    | 61.76                  |
| Macrolide        | <b><i>mef(A)</i><sup>a</sup></b> | macrolide efflux protein A          | 100.00                                             | 100.00                | 100.00              | 100.00               | .                      |
| Macrolide        | <b><i>msr(D)</i></b>             | ribosomal protection protein        | .                                                  | .                     | .                   | 100.00               | .                      |
| Macrolide        | <b><i>erm(B)</i></b>             | 23S ribosomal RNA methyltransferase | 100.00                                             | 100.00                | .                   | 100.00               | .                      |
| Macrolide        | <b><i>erm(F)</i></b>             | 23S ribosomal RNA methyltransferase | .                                                  | 99.88                 | .                   | 100.00               | .                      |
| Macrolide        | <b><i>erm(G)</i></b>             | 23S ribosomal RNA methyltransferase | .                                                  | 100.00                | 100.00              | 100.00               | .                      |
| Macrolide        | <i>erm(Q)</i>                    | 23S ribosomal RNA methyltransferase | .                                                  | 100.00                | 100.00              | 100.00               | .                      |
| Macrolide        | <b><i>lnu(B)</i></b>             | lincosamide nucleotidyltransferase  | .                                                  | 100.00                | 100.00              | 100.00               | .                      |
| Macrolide        | <b><i>lnu(C)</i></b>             | lincosamide nucleotidyltransferase  | 100.00                                             | 100.00                | 100.00              | 100.00               | .                      |
| Macrolide        | <i>lnu(P)</i>                    | lincosamide nucleotidyltransferase  | .                                                  | 100                   | 100                 | 100.00               | .                      |
| Macrolide        | <i>lsaE</i>                      | ribosomal protection protein        | .                                                  | 100.00                | 100.00              | 100.00               | .                      |
| Macrolide        | <i>vat(E)</i>                    | streptogramin acetyltransferase     | .                                                  | .                     | .                   | 66.98                | .                      |
| Nitroimidazole   | <i>nimJ</i>                      | nitroimidazole reductase gene       | 77.71                                              | .                     | .                   | 100.00               | .                      |
| Quinolone        | <b><i>qnrS2</i><sup>b</sup></b>  | antibiotic target protection        | .                                                  | .                     | .                   | .                    | 100.00                 |
| Sulphonamide     | <b><i>sul1</i><sup>c</sup></b>   | dihydropteroate synthase            | .                                                  | .                     | .                   | .                    | 100.00                 |
| Sulphonamide     | <b><i>sul2</i><sup>d</sup></b>   | dihydropteroate synthase            | 78.51                                              | 100.00                | 100.00              | .                    | .                      |

<sup>a</sup> Bold blue charaters indicate a resistance determinant also identified in untreated wastewater from the Budapest North Wastewater Treatment Plant in Hungary by Hendriksen et al. (2019) [ 72 ]. NCBI BioSample: SAMEA4527629

<sup>b</sup> *qnrS2* is included in the QnrS\_clust2 ResFinder gene cluster as described by Munk et al. (2018) and Hendriksen et al., (2019) [30, 72]

<sup>c</sup> *sul1* is included in the sul1\_sul3\_clust ResFinder gene cluster as described by Munk et al. (2018) and Hendriksen et al., (2019) [30, 72]

<sup>d</sup> *sul2* is included in the sul2\_clust ResFinder gene cluster as described by Munk et al. (2018) and Hendriksen et al., (2019) [30, 72]

| Supplementary Table S5. Metadata for the intestinal content samples from Hungary discussed in this study |          |                   |                  |                |                           |         |       |        |            |
|----------------------------------------------------------------------------------------------------------|----------|-------------------|------------------|----------------|---------------------------|---------|-------|--------|------------|
| Species                                                                                                  | Age      | Location, County  | Time of sampling | Code of animal | Code of intestinal sample |         |       |        | References |
|                                                                                                          |          |                   |                  |                | Duodenum                  | Jejunum | Ileum | Faeces |            |
| <i>Sus scrofa</i><br>(domestic pig)                                                                      | 10 weeks | Kaposvár, Somogy  | April 2019       | 2              | 2d                        | 2j      |       | F212   | this work  |
| <i>Sus scrofa</i><br>(domestic pig)                                                                      | 10 weeks | Kaposvár, Somogy  | April 2019       | 4              |                           | 4j      |       |        | this work  |
| <i>Sus scrofa</i><br>(domestic pig)                                                                      | 10 weeks | Kaposvár, Somogy  | April 2019       | 7              | 7d                        |         |       |        | this work  |
| <i>Sus scrofa</i><br>(domestic pig)                                                                      | 10 weeks | Kaposvár, Somogy  | April 2019       | 11             |                           |         |       | F2111  | this work  |
| <i>Sus scrofa</i><br>(domestic pig)                                                                      | 10 weeks | Kaposvár, Somogy  | April 2019       | 12             |                           |         | 12i   |        | this work  |
| <i>Sus scrofa</i><br>(domestic pig)                                                                      | 10 weeks | Kaposvár, Somogy  | April 2019       | 14             |                           |         | 14i   |        | this work  |
| <i>Sus scrofa</i><br>(domestic pig)                                                                      | 10 weeks | Kaposvár, Somogy  | April 2019       | 15             |                           |         |       | F2115  | this work  |
| <i>Sus scrofa</i><br>(domestic pig)                                                                      | 10 weeks | Kaposvár, Somogy  | April 2019       | 16             |                           |         | 16i   |        | this work  |
| <i>Sus scrofa</i><br>(domestic pig)                                                                      | 10 weeks | Kaposvár, Somogy  | April 2019       | 17             |                           |         |       | F2117  | this work  |
| <i>Sus scrofa</i><br>(domestic pig)                                                                      | 10 weeks | Kaposvár, Somogy  | April 2019       | 18             |                           | 18j     |       | F2118  | this work  |
| <i>Sus scrofa</i><br>(domestic pig)                                                                      | 10 weeks | Kaposvár, Somogy  | April 2019       | 20             |                           |         |       | F2120  | this work  |
| <i>Sus scrofa</i><br>(domestic pig)                                                                      | 26 weeks | Herceghalom, Pest | November 2019    | S1             |                           |         |       | S1F    | this work  |
| <i>Cyprinus carpio</i><br>(common carp)                                                                  | 20 weeks | Szarvas, Békés    | October 2019     | P3             |                           |         |       | P3F    | this work  |

**Supplementary Table S6. Basic statistics of the metagenomic contigs obtained for the domestic pig and common carp intestinal samples**

| Sample code                                                                                                                          | 2d       | 7d       | 2j       | 4j       | 18j     | 12i     | 14i      | 16i      | F212     | F2111  | F2115    | F2117    | F2118    | F2120   | S1F      | P3F      |
|--------------------------------------------------------------------------------------------------------------------------------------|----------|----------|----------|----------|---------|---------|----------|----------|----------|--------|----------|----------|----------|---------|----------|----------|
| Contig L50 <sup>a</sup>                                                                                                              | 615068   | 686506   | 536157   | 694272   | 126065  | 125767  | 655429   | 645879   | 100607   | 95927  | 115243   | 88216    | 90407    | 102301  | 128811   | 98278    |
| Contig N50 <sup>b</sup>                                                                                                              | 669      | 512      | 512      | 612      | 535     | 464     | 767      | 780      | 1238     | 1300   | 1253     | 1376     | 1320     | 1268    | 631      | 667      |
| Contig L90 <sup>c</sup>                                                                                                              | 1636613  | 1679349  | 1290392  | 1799988  | 376702  | 367310  | 1808474  | 1780054  | 638115   | 544364 | 633606   | 531894   | 544674   | 599110  | 459535   | 351090   |
| Contig N90 <sup>d</sup>                                                                                                              | 376      | 341      | 341      | 356      | 332     | 322     | 400      | 401      | 365      | 382    | 383      | 388      | 380      | 376     | 334      | 339      |
| Contig length, max                                                                                                                   | 307451   | 115205   | 80308    | 68117    | 346047  | 61418   | 237840   | 244377   | 311058   | 374789 | 433364   | 409751   | 414955   | 253362  | 179407   | 316779   |
| Contig lenght, min                                                                                                                   | 200      | 200      | 200      | 200      | 200     | 200     | 200      | 200      | 200      | 200    | 200      | 200      | 200      | 200     | 200      | 200      |
| Contig lenght, mean                                                                                                                  | 635      | 514      | 512      | 584      | 564     | 518     | 701      | 706      | 879      | 930    | 917      | 960      | 928      | 909     | 625      | 646      |
| Contig lenght, median                                                                                                                | 524      | 441      | 446      | 488      | 423     | 388     | 565      | 571      | 451      | 490    | 492      | 495      | 481      | 476     | 419      | 433      |
| Contig lenght, STD                                                                                                                   | 633      | 448      | 347      | 370      | 1840    | 741     | 591      | 557      | 2416     | 2400   | 2428     | 2664     | 2396     | 2176    | 1127     | 1672     |
| Number of bp in contigs                                                                                                              | 1,28E+09 | 1,03E+09 | 7,88E+08 | 1,28E+09 | 2,6E+08 | 2,3E+08 | 1,59E+09 | 1,58E+09 | 7,67E+08 | 7E+08  | 7,99E+08 | 7,12E+08 | 6,99E+08 | 7,5E+08 | 3,59E+08 | 2,85E+08 |
| Number of contigs                                                                                                                    | 2018347  | 2002954  | 1537694  | 2190673  | 461470  | 442807  | 2264603  | 2230600  | 871835   | 752123 | 871432   | 741830   | 753406   | 824729  | 573434   | 440803   |
|                                                                                                                                      |          |          |          |          |         |         |          |          |          |        |          |          |          |         |          |          |
|                                                                                                                                      |          |          |          |          |         |         |          |          |          |        |          |          |          |         |          |          |
| <sup>a</sup> L50 is defined as count of smallest number of contigs whose length sum makes up 50% of total metagenomic contigs length |          |          |          |          |         |         |          |          |          |        |          |          |          |         |          |          |
| <sup>b</sup> N50 is defined as the sequence length of the shortest contig at 50% of the total metagenomic contigs length             |          |          |          |          |         |         |          |          |          |        |          |          |          |         |          |          |
| <sup>c</sup> L90 is defined as count of smallest number of contigs whose length sum makes up 90% of total metagenomic contigs length |          |          |          |          |         |         |          |          |          |        |          |          |          |         |          |          |
| <sup>d</sup> N90 is defined as the sequence length of the shortest contig at 90% of the total metagenomic contigs length             |          |          |          |          |         |         |          |          |          |        |          |          |          |         |          |          |
